# Supplementary material for: A Protocol for the Automatic Construction of Highly Curated Genome-Scale Models of Human Metabolism
Source: MDPI journal article supplement (doi:10.3390/bioengineering10050576), 2023-05-10
Supplement: s1 [file s1]

# 1. Graphical representation of the code for the automatic construction of GEMs

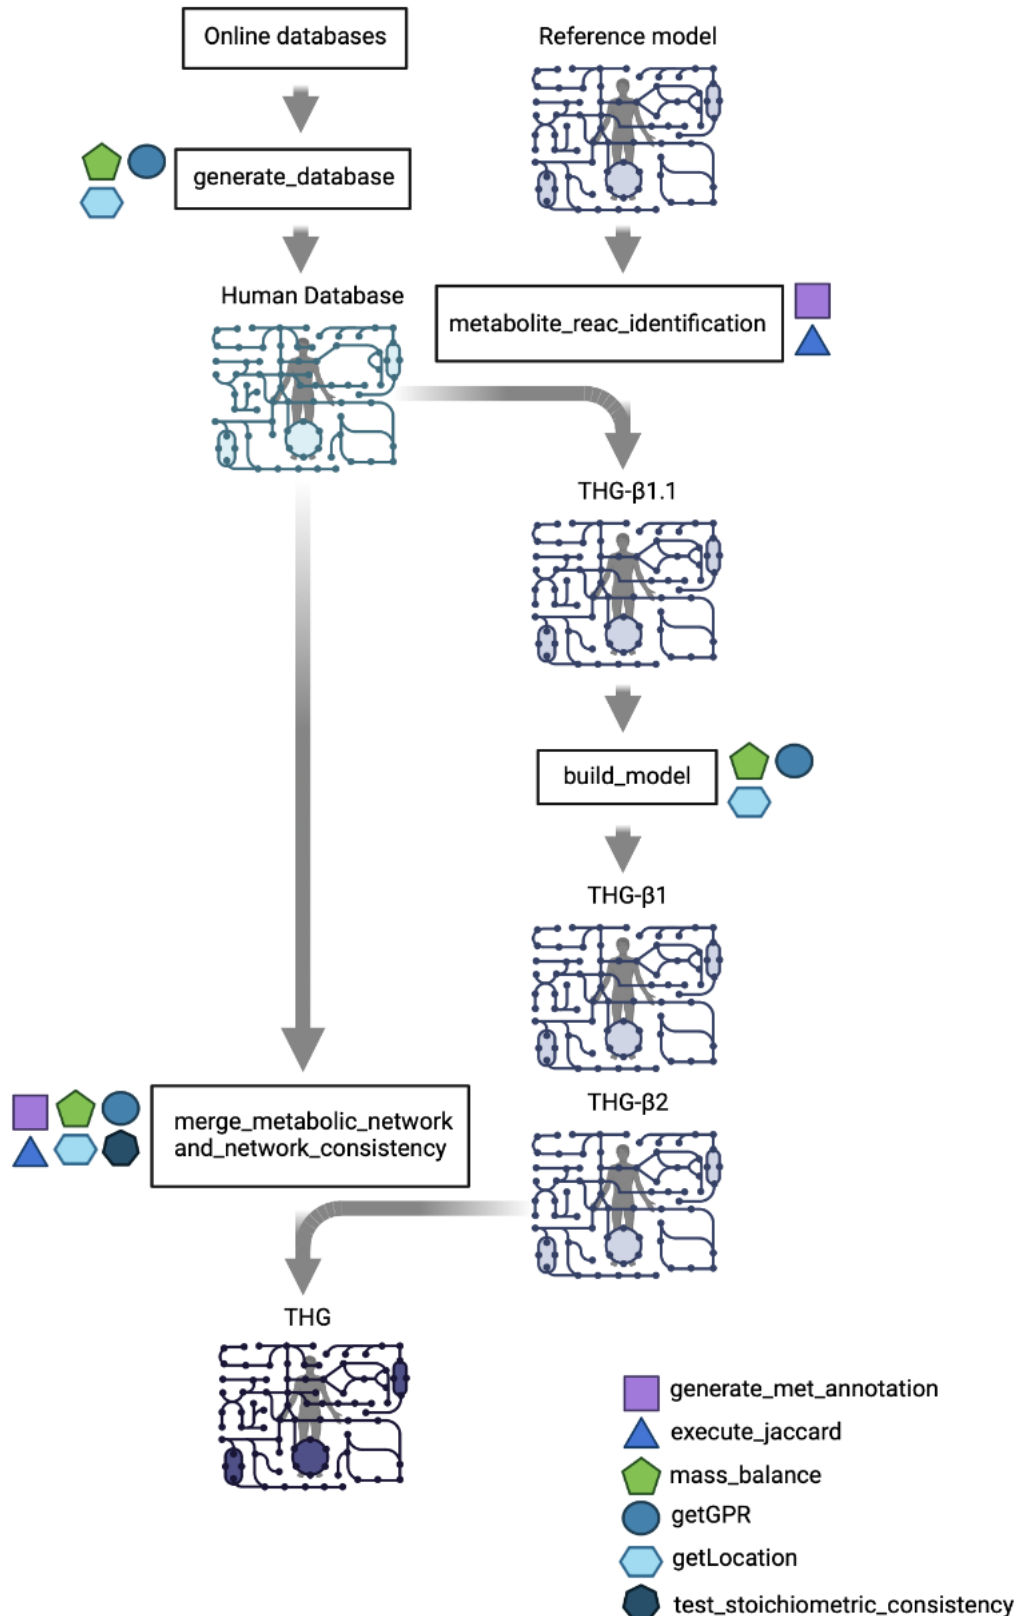

Supplementary figure 1: Figure representing the different steps described in the protocol to construct genome-scale models of human metabolism together with the developed algorithms to build, curate, test and refine the constructed GEM

## 2. Pseudo Code for “Building model” process

```
## A.
Improve metabolite annotation in the reference model
# A.1
Gather metabolites info from a
```

```
`model`, filtering out from `identifiers`.
met_list = empty list
for each met in model.metabolites do the following:
```

```

create a tuple met_tuple with elements met.name, met.formula, met.annotation, met.id[:-1]
if met_tuple is not in met_list then:
    add met_tuple to met_list

```

## # A.2 Identify metabolite annotations .

```

unannotated = []
annotated = []
met_annotation = { }
# Loop through each metabolite in the metabolite list
for name, formula, annotation, iden in met_list:
    # Identify the metabolite
    result = identify_metabolite(name, formula, iden)
    met = [name, formula, annotation, iden] #Identify metabolite annotation in different databases
database
    # If the metabolite could not be identified, add it to the list of unannotated metabolites
    if result is None:
        unannotated.append(met)
    # Otherwise, write the result to output file and add metabolite to the annotated metabolites list
    else:
        met_annotation[met.id] = met #Save the resulting metabolite annotation dictionary in
“met_annotation” variable
        annotated.append(met)

```

## ## B. Improve reaction annotation in the reference model

### # B.1 Gather reactions info from a `model`, filtering out from `identifiers`.

```

result = { }
# Find all reactions in the input model.
for n, reaction in enumerate(model.reactions):
    result[reaction id] = result + [identify_reaction(reaction, n)]

```

### # B.2 Execute JI on metabolic reactions

```

met_annotation = { }
for id1, l1, r1, a, rev in zip(reaction id 1, substrates and products and their stoichiometries in reaction 1):
    for id2, l2, r2, b in zip(reaction id 2, substrates and products and their stoichiometries in reaction 2):
        a, b = str(a), str(b)
        # for reactions “a+b → c+d” and “e+f → g+h”, compare the groups [a,b],[e,f] and [c,d],[g,h]
        Jllrr = jaccard(l1.split(','), l2.split(',')) + jaccard(r1.split(','), r2.split(','))
        if rev == True: # if reaction is reversible
            # for reactions a+b → c+d and e+f → g+h, compare the groups [a,b],[g,h] and [c,d],[e,f]
            Jlrrl = jaccard(l1.split(','), r2.split(',')) + jaccard(r1.split(','), l2.split(','))
        else:
            Jlrrl = 0
        if Jllrr == 2.0 or Jlrrl == 2.0:
            met_annotation[id1] = [attributes in reaction 1, a,l,r,b,l2,r2,2.0] #Save the resulting reaction
annotation dictionary in “met_annotation” variable
            break

```

## ## C. Improve model annotation

```
annotate_cobra_model(output_cobra_model_file_name, met_annotation, reac_annotation)
```

## D. mass balance reactions, improve genes and S-GPR/GPR annotation and isoenzyme-based model expansion

```
model = read_sbml_model('models/output_cobra_model_file_name.xml') # Read in the model from an SBML file
```

```
with model: # Loop over reactions in a model
```

```
    for reac_count, x2 in enumerate(model.reactions[0:]):
```

```
        ## Collect information from the reaction
```

```
        # Get the upper and lower bounds for the reaction
```

```
        bounds = x2.bounds
```

```
        # Get the EC code for the reaction
```

```
        try:
```

```
            if 'ec-code' in x2.annotation:
```

```
                EC = x2.annotation['ec-code']
```

```
        else:
```

```
            EC = "
```

```
        # Get the species in the reaction
```

```
        species = [s.id for s in x2.reactants] + [s.id for s in x2.products]
```

```
        # Get the stoichiometric coefficients for each species
```

```
        species3 = [{s.split(' ')[0]: -1} if len(s.split(' ')) == 1 else {s.split(' ')[1]: -abs(float(s.split(' ')[0]))}
```

```
for s in re.split(' --> | <=> ', re.sub('[a-z]+', '', x2.reaction))[0].split(' + ')] + [{s.split(' ')[0]: 1} if
```

```
len(s.split(' ')) == 1 else {s.split(' ')[1]: float(s.split(' ')[0])} for s in re.split(' --> | <=> ', re.sub('[a-z]+', ''
```

```
species3 = dict(ChainMap(*species3)) # Convert the list of species and coefficients to a dictionary
```

```
        # Get the GPR for the reaction
```

```
        gpr = x2.gpr
```

```
        # Get the annotations for the reaction
```

```
        annotation2 = x2.annotation
```

```
        # Get the compartments for each species
```

```
        locations = list(set([model2.metabolites.get_by_id(s).compartment for s in species]))
```

```
## Mass balanced
```

```
mb = x2.check_mass_balance() # Check if the reaction is mass balanced
```

```
all_met_have_formula_test = min([1 if ListOfMetFrom[x] else 0 for x in species]) # Check if all metabolites in the reaction have a formula
```

```
# If all metabolites have a formula, replace the metabolite IDs with the corresponding formula
```

```
if all_met_have_formula_test == 1:
```

```
    FromList=list()
```

```
    for y in species:
```

```
        eq = re.sub(y, ListOfMetFrom[y], eq)
```

```
        eq_test = re.sub(y, ListOfMetFrom[y], eq_test)
```

```
# Check if the reaction is balanced and not an exchange or sink reaction
```

```
if len(species) > 1 and all_met_have_formula_test == 1 and not test_reaction_balance(eq_test)[0]:
```

```
    MB = mass_balance(eq, 'R') # Get the mass balance for the reaction
```

```
    # Get the new species and stoichiometric coefficients
```

```
    NewSpecies = MB[6]+MB[7] # Species added to substrates and/or products to mass balance
```

```

    NewStoichimotry = MB[0]+MB[1] # Stoichimetry of the rebalanced reaction
    # Modify x2 according to NewSpecies and NewStoichimotry
## S-GPRs and Location
for ec in EC:
    new_gpr = getGPR(ec, session) # build a new S-GPR and GPR
    if new_gpr:
        new_locations = getLocation(new_gpr[3], new_gpr[1], new_gpr[2], 1, location_pkl_file,
session) # Identify the subcellular location based on the genes in the GPR
        variables[ec].extend(new_gpr) # Add new GPR to the entry in the dictionary variables with
key "ec"
        variables[ec].extend(new_locations) # Add new Subcellular location to the entry in the
dictionary variables with key "ec"
        variables[x.id] = meltGeneList(new_gpr in variables[ec], new_location in variables[ec]) #
integrate the all the new_gpr and new_location of a given reaction
        for i in variables[x.id]:
            CSL = ith subcellular location with the corresponding S-GPR/GPR and genes
            if x.id for the ith subcelular location does not exist in the model:
                Build a new reaction with the attributes in x.id and the subcellular location specific
information in CSL
            else:
                Update the information regarding genes and S-GPR/GPR in the existing reaction

## E. Sanitize model and store the final model in a SBML file
- Eliminate duplicate reactions
- Eliminate unconnected metabolites
- Rebalance metabolic reaction
- write_sbml_model(sanitized_model, "Output_model.xml") # Writte the sbml model:

```

### **3. Pseudo Code for "Building model" process**

```

# A. Build a metabolic network based on a list of pathways, add reactions, metabolites, ensure network
consistecy, curate annotation and ensure mass balance
Path = List of metabolic pathways containing pathway name and id (i.e. KEGG )
i = 0
while i < len(Path) - 1:
    # Extarct pathway information
    PathID = split_path_id(Path[i]) # pathway id
    PathName = split_path_name(Path[i]) # pathway name
    PathURL = build_path_url(PathID) # patwhway url
    PathReferer = build_path_referer(PathID)
    PathList[PathID] = create_pathway_object(PathURL, time, PathID, PathReferer, PathName) #
Pathway object gathering information from different databases
    PathNameRxn[PathName] = "" # empty dictionary for the reaction in the pathway
    j = 0
    while j < len(PathList[PathID].Reactions()):
        RxnID = get_reaction_id(j, PathList[PathID]) # Reaction identifier in the database that will be
used in the model
        if not_rxn_id_in_ident_or_equiv(RxnID): # add reaction if reaction is not previously annotated
            RxnIdent = add_rxn_id_to_ident(RxnID, RxnIdent) # add reaction ids

```

```

    RxnURL, RxnTermDyn = get_rxn_url_and_term_dyn(j, PathList[PathID]) # reaction url and
reversibility
    RxnList[RxnID] = create_reaction_object(RxnURL, time, RxnID, PathName, RxnTermDyn) #
Reaction object gathering information from different databases
    RxnCmp = get_rxn_compounds(RxnID, RxnList) # identify reaction's substrates and products
    c = 0
    while c < len(RxnCmp):
        CompID = RxnCmp[c]
        if not_comp_id_in_ident_or_equiv(CompID): # add metabolite is not previously annotated
            MetIdent = add_comp_id_to_ident(CompID, MetIdent)
            CompURL = build_comp_url(CompID)
            MetList[CompID] = create_compound_object(CompURL, CompID, time, EF,
specialCompounds) # Metabolite object gathering information from different databases
            c = c + 1
        # Mass balance reaction
        ithRxn = RxnList[RxnID]
        eq, mb_test = get_eq_and_mb_test(ithRxn, MetList) # test if reaction is unbalanced
        LibIni = wrap_rxn_subs_prod_param(ithRxn, MetList) # extract information from the reaction
object to be lately reintroduced together with the balanced reaction
        if mb_test != 0: # mass balance the reaction in case of unbalance
            IthRxnMB = mass_balance(eq, RxnID) # Mass balance the metabolic reaction
            # If an additional metabolite has to be added to mass balance the metabolic reaction check if
it/they is/are already added to the model, and if not add it/them
            if IthRxnMB[4]:
                for x in IthRxnMB[4]:
                    if not extra_compound[x[0]] in MetIdent and not extra_compound[x[0]] in MetEquiv:
                        MetIdent = add_extra_comp_id_to_ident(x[0], MetIdent)
                        extra_url = build_extra_comp_url(extra_compound[x[0]])
                        MetList[extra_compound[x[0]]] = create_compound_object(extra_url,
extra_compound[x[0]], time, EF, specialCompounds) # Metabolite object gathering information from
different databases
                        RxnList[RxnID] = update_rxn_substrate_product_and_kinetics(ithRxn, LibIni, ithRxnMB,
MetList, MetEquiv) # update the reaction object with the rebalanced reaction
                        update_rxn_list(RxnID, RxnList) # add updated information to the list of reactions
                j = j + 1
            i = i + 1

# B: Gene annotation and build S-GPRs and GPRs
GeneList = {} # Initialize an empty dictionary to store gene information
GeneIdent = [] # Initialize an empty list to store gene identifiers
g = 0
# Loop through each gene-protein-reaction (GPR) association in the list
while g < len(GPRList):
    # Check if the gene identifier is already in the dictionary and has subcellular location information
    if GPRIdent[g] in GPRList.keys() and GPRList[GPRIdent[g]].GprSubcell():
        # Extract the gene names from the subcellular location information
        gene_matches = re.findall(
            "([A-Za-z0-9\-\_]+)",
            GPRList[GPRIdent[g]].GprSubcell()[1].replace("and", "").replace("or", ""),

```

```

)
# Loop through each gene name in the list
z = 0
while z < len(gene_matches):
    # If the gene name is not already in the list of gene identifiers, add it and its information to the
    dictionary
    if not gene_matches[z] in GeneIdent:
        GeneIdent = GeneIdent + [gene_matches[z]]
        GeneList[gene_matches[z]] = gene(gene_matches[z], EnsblDB) # Gene object gathering
        information from different databases
    z = z + 1
g = g + 1

# C: Identify sub-cellular locations
# Remove any non-alphanumeric characters from the compartment name and get a master list of IDs
CSL2 = re.sub(r'^A-Za-z0-9 ]+', '', CSL)
ModMaster = list(set(LipidMasterlistOfID + listOfID))
# Assign the ID to the CSL if it already exists in the CSL_ID dictionary, otherwise generate a new ID
if CSL_ID.get(CSL):
    ID = CSL_ID.get(CSL)
elif len(re.sub(" $", "", re.sub("^ ", "", CSL))).split(" ") > 1:
    ID = (CSL2.split(" ")[0][0] + CSL2.split(" ")[1][0]).lower().replace(" ", "")
else:
    if len(CSL.split(" ")) > 1:
        ID = CSL2[0:3].lower().replace(" ", "")
    else:
        ID = CSL2[0:2].lower().replace(" ", "")
# If the generated ID already exists in the master list, append a number to the end to make it unique
if not CSL_ID.get(CSL) and ID in ModMaster:
    r = re.compile(ID)
    ID = ID + str(len(list(filter(r.match, ModMaster))) + 1)
# Assign the ID to the compartment in the LocVar dictionary
LocVar[CSL] = ""
LocVar[CSL] += ID
# Append the ID to the list of IDs and the master list of Lipid IDs
listOfID.append(ID)
LipidMasterlistOfID.append(ID)

# D: Gather all the information collected in the previous steps and write it in a model in SBML format
model = cobra_reconstruction(
    ModName, ModID, MetList_CL, RxnList_CL, GeneList, PathNameRxn, LocVar, MetEquiv,
    MetList
)
cobra.io.write_sbml_model(model, Output)

```

#### **4. Pseudo Code for “/merge metabolic netowrks and network consistency/” process**

```

# A: Load input data

```

```
network_1 = read_sbml_model(GEM1) # target network (i.e. network from GEM)
network_2 = read_sbml_model(GEM2) # source network (i.e. network from DBs)
# B: Merge metabolites
network_3 = network_metabolites_merge(network_1, network_2)
# C: Merge genes
network_3_genes = network_genes_merge(network_3_metabolites, network_2)
# D: Merge reactions and test network consistency
network_3_reactions = network_reactions_merge(network_3_genes_model, network_2)
# E: Sanitize model
new_network_4_metabolites = delete_isolated_metabolites(network_3_reactions)
new_network_4_reactions = delete_not_used_reactions(new_network_4_metabolites)
new_network_4_genes = delete_not_used_genes(new_network_4_reactions)
# F: Write output model in a file
write_sbml_model(new_network_4_genes, Output)
```
